# Supplementary material for: TBC1D9: An Important Modulator of Tumorigenesis in Breast Cancer
Source: MDPI journal article supplement (doi:10.3390/cancers13143557), 2021-07-16
Supplement: s1 [file s1]

**Table S1.** Molecular classification of BC cell lines.

| Cell Line  | ER | PR | HER2 | Subtype   |
|------------|----|----|------|-----------|
| MCF7       | +  | +  | -    | Luminal A |
| T47D       | +  | +  | -    | Luminal A |
| BT-474     | +  | +  | +    | Luminal B |
| SKBr3      | -  | -  | +    | HER2      |
| JIMT-1     | -  | -  | +    | HER2      |
| SUM159PT   | -  | -  | -    | TNBC      |
| SUM149PT   | -  | -  | -    | TNBC      |
| MDA-MB-231 | -  | -  | -    | TNBC      |
| MDS-MB-468 | -  | -  | -    | TNBC      |
| BT-549     | -  | -  | -    | TNBC      |

Abbreviations: +: Positive; -: Negative.

**Table S2.** Primer sequence.

| Gene Symbol   | Description                                                                  | Size (bp) | Primer sequence 5'→3'<br>Forward/Reverse                    |
|---------------|------------------------------------------------------------------------------|-----------|-------------------------------------------------------------|
| <b>TBC1D9</b> | TBC1 Domain Family Member 9                                                  | 90        | CAGCAGCCTCGTCTCCTCCAG/<br>GGGACGCTGTTGCCATTTAGG             |
| <b>ARL8A</b>  | ADP ribosylation factor like GTPase 8A                                       | 116       | TAGTCCTGGGTAACAAGCGAGAC /<br>TGCAAGAGATGGAGTAGCAGCAG        |
| <b>ARL8B</b>  | ADP ribosylation factor like GTPase 8B                                       | 122       | TGATACCCACAGTGGGCTTCAAC /<br>TGACTCCTCTGCAATACCGCTC         |
| <b>PLK1</b>   | Polo like kinase 1                                                           | 123       | GCACAGTGTCAATGCCTCCAAGC /<br>GCCGTACTTGTCCGAATAGTCC         |
| <b>HIF-1α</b> | Homo sapiens hypoxia inducible factor 1 subunit alpha (HIF1A), 3 transcripts | 144       | TATGAGCCAGAA-<br>GAACTTTTAGGCC/CCACCTCTTTGG-<br>CAAGCATCCTG |
| <b>HK2</b>    | Hexokinase 2                                                                 | 94        | GAATGGGAAGTGGGGTGGA /<br>TGTGGTCAAAGAGCTCGTCC               |
| <b>SPP1</b>   | Homo sapiens secreted phosphoprotein 1                                       | 108       | AAGAAGTTTCGCAGACCTGACATC /<br>AACGGGGATGGCCTTGTATGC         |
| <b>STAT3</b>  | Signal transducer and activator of transcription 3                           | 133       | CCTTTGAGACCGAGGTGTATCACC /<br>GGTCAGCATGTTGTACCACAGG        |
| <b>HPRT1</b>  | Homo sapiens hypoxanthine phosphoribosyltransferase 1                        | 86        | CGTCGTGATTAGTGATGATGAACCA/<br>ACACCCTTTCCAAATCCTCAGC        |
| <b>GAPDH</b>  | Homo sapiens glyceraldehyde-3-phosphate dehydrogenase                        | 93        | CGGGGCTCTCCAGAACATCAT/<br>ATGCCAGTGAGCTTCCCGTTC             |

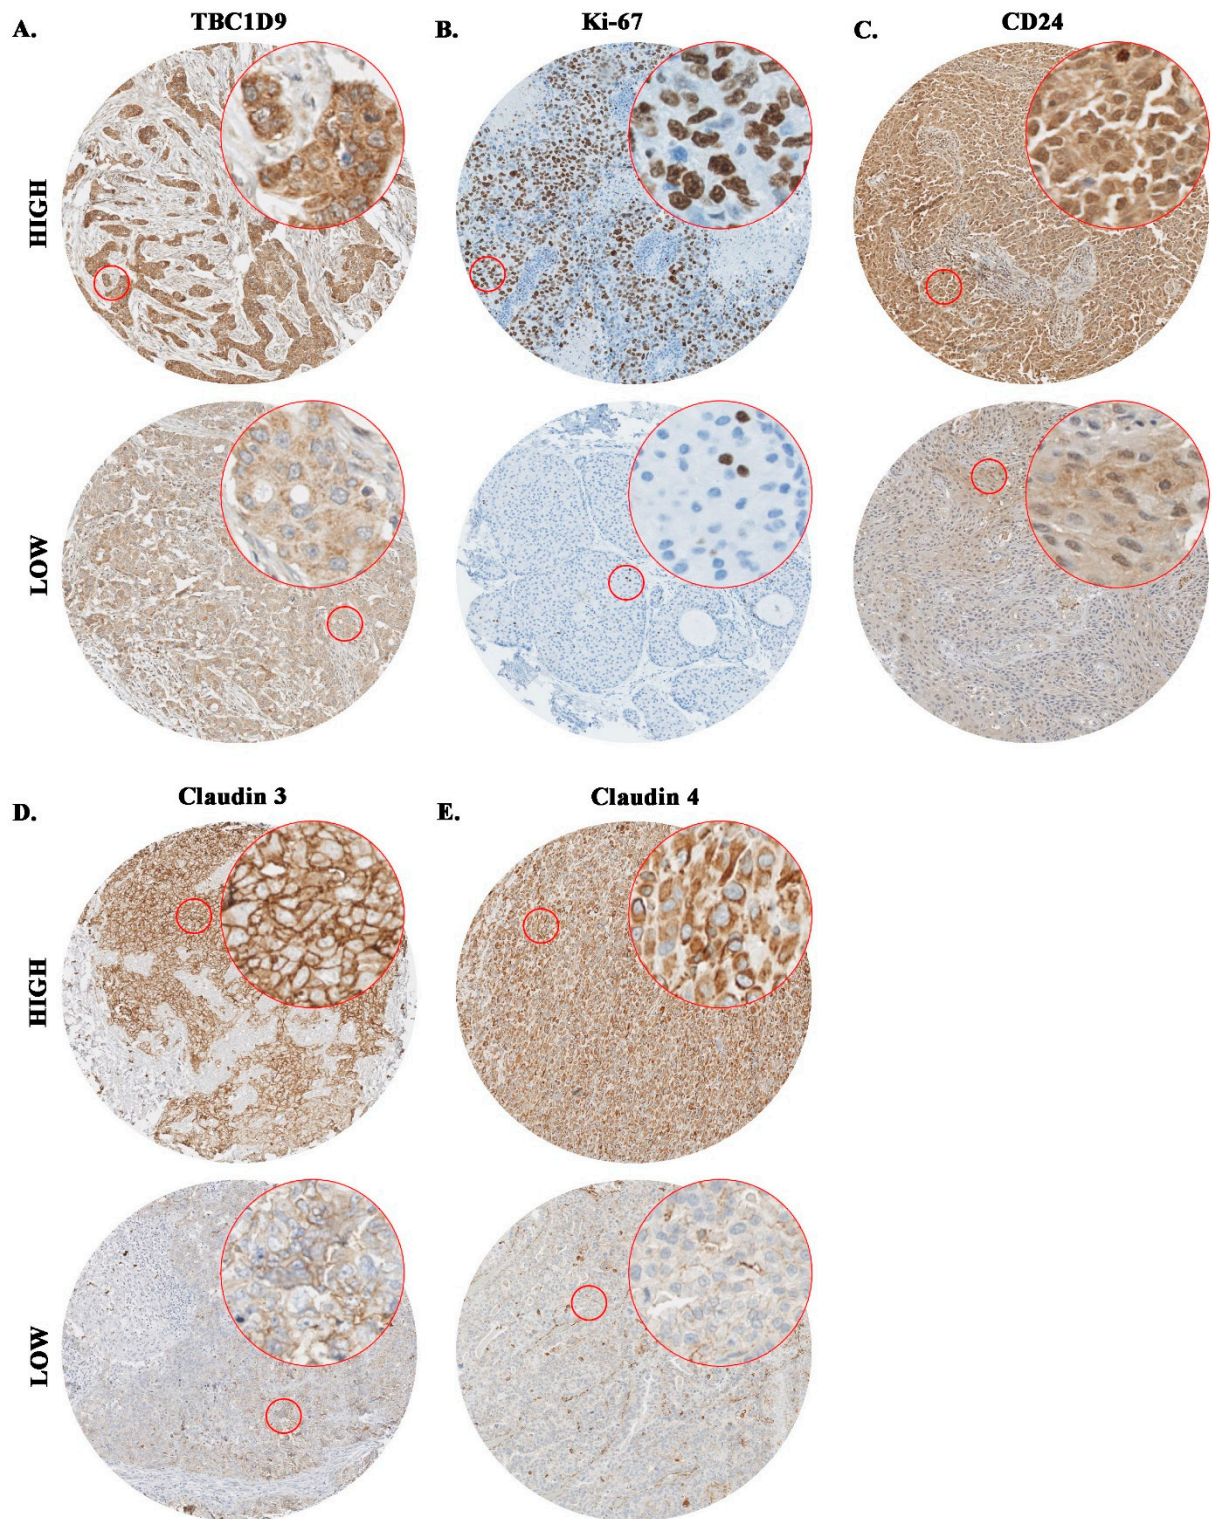

**Figure S1.** Representative images of IHC staining for different antibodies. Figure S1: Representative images of IHC staining for different antibodies. TBC1D9 (A), Ki-67 (B), CD24 (C), Claudin 3 (D), and Claudin 4 (E). Scale bar 100µm.

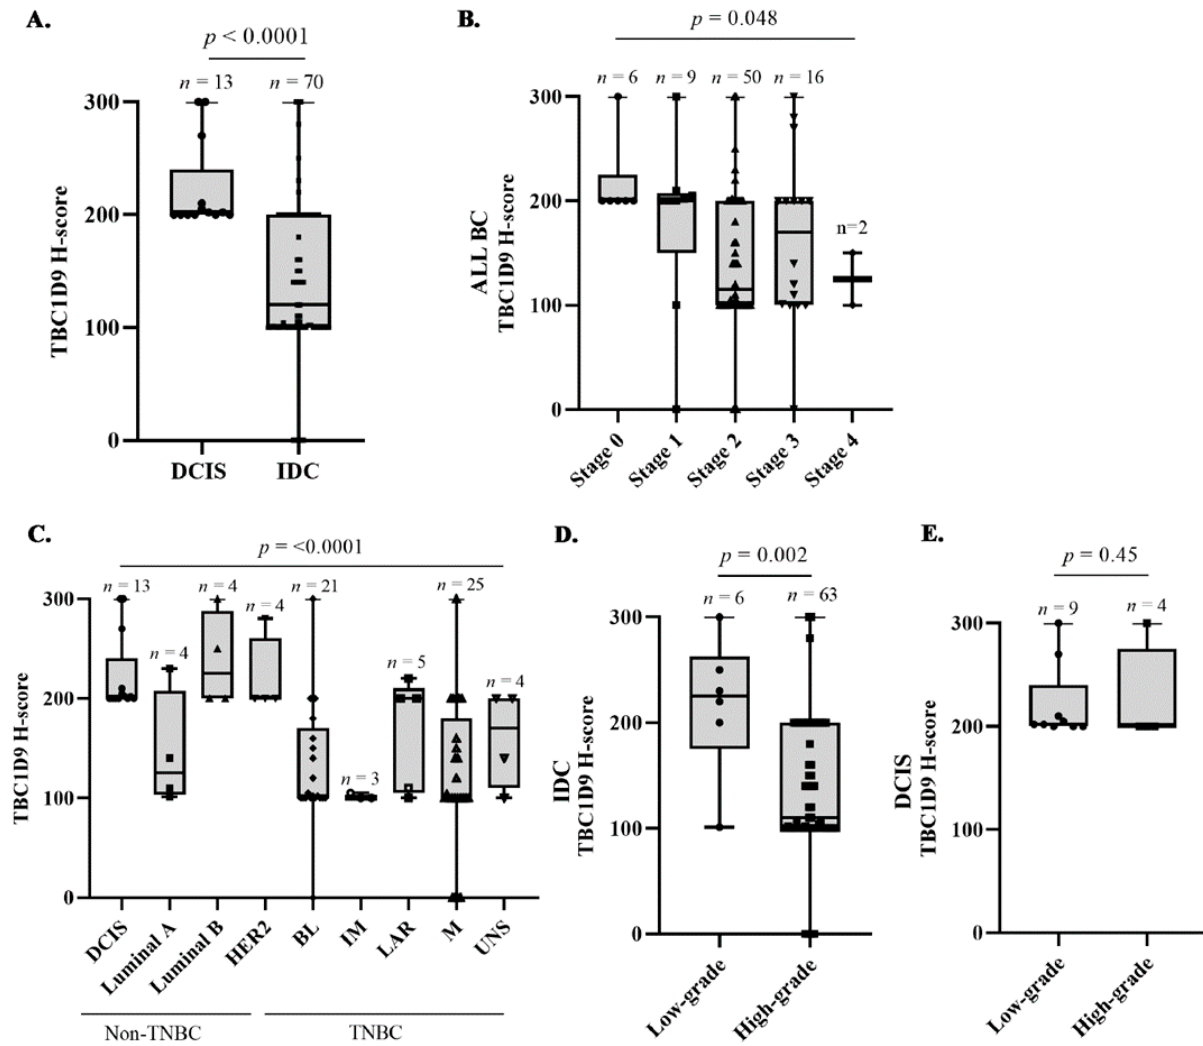

**Figure S2.** TBC1D9 expression in BC tissue samples from our cohort. Stratified by DCIS vs. IDC (A) and according to BC stage (B) and the molecular subtypes of BC (C). BC samples were stratified by grade for IDC (D) and DCIS (E). BL, = basal-like, IM = immunomodulatory, LAR = luminal androgen receptor, M = mesenchymal, UNS = unclassified.

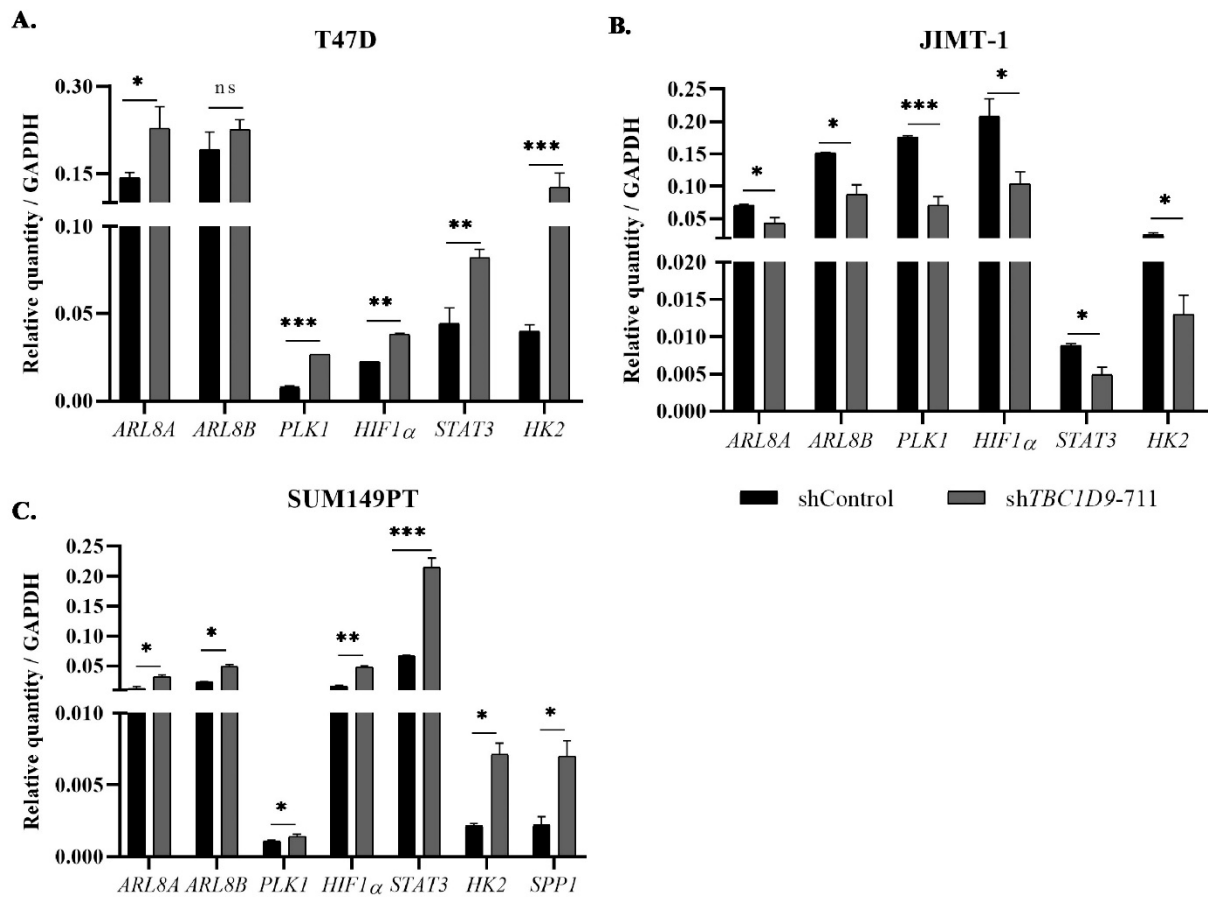

**Figure S3.** Validation of signaling altered by knockdown of TBC1D9 in BC cell lines. T47D: luminal A (A), JIMT-1: HER2 (B), SUM149PT: TNBC (C), and HK = GAPDH. ; ns: not significant
